# Supplementary material for: Graph Independent Component Analysis Reveals Repertoires of Intrinsic Network Components in the Human Brain
Source: PLOS journal article supplement (doi:10.1371/journal.pone.0082873), 2014-01-07
Supplement: S3 (10.1371/journal.pone.0082873.s003) [file journal.pone.0082873.s003]

## Text S1. Modularity optimization

Modularity ( $Q$ ) is defined as (total connection weight within the subnetwork) – (chance-expected total connection weight) and modularity optimization is to find network-partitioning that maximizes  $Q$  [1]. This mathematical concept is expressed as follows:

$$Q = \frac{1}{V} \sum_{ij} (w_{ij} - e_{ij}) \delta_{M_i M_j} \quad (1)$$

$$e_{ij} = \frac{s_i s_j}{V}, \quad s_i = \sum_j w_{ij}, \quad V = \sum_{ij} w_{ij} \quad (2)$$

where  $e_{ij}$  is the chance-expected total weight,  $w_{ij}$  is the connection weight between node  $i$  and  $j$ ,  $V$  is the total sum of weights to which  $Q$  is rescaled  $[0,1]$ , and  $\delta_{M_i M_j}$  is an indicator with a value of 1 if node  $i$  and  $j$  are in the same subnetwork and a 0 value, otherwise.

To compare with subnetworks identified by graph-ICA, we performed weighted modularity optimization. Prior to modularity optimization, we conducted Fisher's r-to-z transformations of inter-regional functional connectivity among 90 cortical regions for each subject and averaged them. Resulting modules (subnetworks) were normalized z-scores in spatial dimension with a threshold of  $z > 3$ .

## Reference

1. Newman ME (2006) Finding community structure in networks using the eigenvectors of matrices. *Phys Rev E Stat Nonlin Soft Matter Phys* 74(3 Pt 2):036104.
